# Supplementary material
Source: publisher figshare collection journal article supplement (https://acs.figshare.com/ndownloader/files/6007218)
Supplement: Supplementary file 1 [file 6007218]

Compound_ID	SMILES	IC50 (�M)
5	NCC[C@@H](CN[C@@H](CC3=CC=CC=C3)[C@H](O)CN2CC(CCCC4)C4C[C@H]2CNC(C)(C)C)NCC1C(O)CC(C=CC=C5)=C5N1	4.5+/-1.6
6	O[C@H](CN2C[C@](CCCC4)([H])[C@@]4([H])C[C@H]2CNC(C)(C)C)[C@H](CSC3=CC=CC=C3)NCC1=C(C)C(O)=CC=C1	7.27+/-0.5
7	O[C@H]([C@H](CC2=CC=CC=C2)NCCOC1=C(C)C=CC=C1C)C[C@H](CC3=CC=CC=C3)NC[C@H]([C@H](C)C)NCCCNC	2.08+/-0.8
8	O[C@@H](C[C@@H](CC3=CC=CC=C3)CN[C@H]2C(C=CC=C4)=C4C[C@H]2O)CN1[C@H](CNC(C)(C)C)CNCC1	42.7+/-19.7
